# Supplementary material for: Computational design of orthogonal nucleoside kinases
Source: Royal Society of Chemistry journal article supplement (doi:10.1039/c0cc02961k), 2010-01-01

1  
2  
3  
4 **SUPPLEMENTARY INFORMATION**  
5

6  
7 **Computational design of an orthogonal nucleoside analog kinase**  
8

9  
10 Lingfeng Liu<sup>1</sup>, Paul Murphy<sup>2</sup>, David Baker<sup>2,3</sup>, Stefan Lutz<sup>1\*</sup>  
11

12  
13 <sup>1</sup>Department of Chemistry, Emory University, 1515 Dickey Drive, Atlanta, GA 30322,

14 <sup>2</sup>Department of Biochemistry, University of Washington, Box 357350, Seattle, WA  
15 98195 & <sup>3</sup>Howard Hughes Medical Institute, Seattle, WA 98195  
16

17 *Corresponding author:* Stefan Lutz (sal2@emory.edu)  
18  
19

20  
21 **MATERIAL AND METHODS**  
22

23  
24 *Materials:* Oligodeoxynucleotides were ordered from Integrated DNA Technologies  
25 (Coralville, IA). *Pfu* Turbo DNA polymerase (Stratagene, La Jolla, CA) was used for DNA  
26 amplification. Restriction enzymes were purchased from New England Biolabs (Ipswich, MA)  
27 while pyruvate kinase and lactate dehydrogenase were obtained from Roche Biochemicals  
28 (Indianapolis, IN). All other reagents were obtained from Sigma-Aldrich (St. Louis, MO)  
29 unless otherwise indicated.  
30

31  
32 *Computational design:* The Rosetta suite for molecular modeling (Rosetta++ 2.3.1) was used  
32 for design predictions. The coordinates for DmdNK with a bound thymidine (PDB access#:  
33 1OT3<sup>1</sup>) were chosen as starting point for the modeling. Following replacement of the substrate  
34 thymidine with the modeled structure of the nucleoside analog ddT, two rounds of design were  
35 performed.  
36

37  
38 In the first round, residues which contained atoms within 6.5 angstroms of the thymidine-  
39 O3' were designed. The threshold was chosen to include residues that are part of the ribose  
40 binding pocket and in the immediate vicinity of the 3'-position of the substrate. Six residues  
41 were selected (I29, L66, M69, Y70, E172, and V175). The design protocol used for this first  
42 round was fixed-backbone design using Monte Carlo sampling of an expanded version of the  
43 Dunbrack rotamer library according to the Rosetta full-atom energy function.<sup>2,3</sup> The results of  
44 the first round revealed that I29 and M69 were not situated appropriately, despite their  
45 proximity, to interact the substrate near the thymidine O3'.  
46  
47  
48  
49

1  
2  
3  
4 For this reason, a second round of design including only L66, Y70, E172, and V175 was  
5 performed. Since substitutions to E172 had already been identified as being critical to substrate  
6 specificity, the second round calculations were performed twice, once with and once without  
7 E172, using residues (L66, Y70, and E172) and (L66, Y70, and V175) respectively. The side  
8 chains of other residues in the vicinity of the four targeted amino acids were allowed to vary in  
9 conformation only. No changes were made to the conformation of the polypeptide backbone or  
10 to the position of waters in the binding pocket.  
11

12 Given the small set of residues ( $n=3$ ), combinations of new amino acid identities for these  
13 residues were sampled exhaustively and assignments for each of the 8000 ( $20^3$ ) combinations  
14 were made. Residues within  $10\text{\AA}$  of the designed residues were allowed to repack and minimize  
15 with respect to the side chain degrees of freedom. The position of the substrate was held fixed.  
16 Calculations were performed for transition state models of ddT and Thy independently. The  
17 predicted energy of interaction between the enzyme and ddT ( $\Delta G_{\text{ddT}}$ ) was used to estimate the  
18 catalyst's activity for the NA. Separately, the difference in energies of interaction ( $\Delta\Delta G$ ) was  
19 calculated by subtracting  $\Delta G_{\text{Thy}}$  from  $\Delta G_{\text{ddT}}$  to provide an approximation of relative specificity.  
20 Of the 8000 possibilities, designs with maximal  $\Delta\Delta G$  and low  $\Delta G_{\text{ddT}}$  values were identified.  
21 Using both criteria favored designs with high activity and specificity for ddT relative to Thy.  
22  
23  
24  
25

26 *Site-directed mutagenesis:* Site-specific amino acid substitutions in DmdNK were introduced  
27 by primer overlap extension mutagenesis. PCR products were cloned into pMAL-c2x  
28 (Invitrogen, Carlsbad, CA) via EcoRI and HindIII restriction sites and transformed into *E. coli*  
29 TOP10 (Invitrogen). Transformants were cultured on LB-agar plates, supplemented with  
30 ampicillin ( $50\ \mu\text{g}/\text{mL}$ ) at  $37^\circ\text{C}$  and colonies were harvested, flash-frozen, and stored at  $-80^\circ\text{C}$ .  
31 The correct gene sequences were confirmed by DNA sequencing.  
32

33 *Protein expression and purification:* For in vitro characterization, WT DmdNK and selected  
34 kinase mutants were overexpressed as fusion proteins with a N-terminal maltose-binding  
35 protein (MBP). Individual kinase genes were subcloned into pMAL-C2x (NEB) and  
36 transformed into *E. coli* K12 TB1 (NEB). Cell cultures were grown in 100 mL LB media  
37 containing ampicillin ( $100\ \mu\text{g}/\text{mL}$ ) to an OD (600 nm) of  $\sim 0.5$  at  $37^\circ\text{C}$  and protein expression  
38 was induced with 0.3 mM IPTG for 12 h at  $20^\circ\text{C}$ . The cells were centrifuged and pellets were  
39 resuspended in 5 mL lysis buffer (20 mM Tris-HCl, pH 7.4; 0.2 M NaCl; 1 mM EDTA; 1 mM  
40 ATP) and mixed with 50  $\mu\text{L}$  protease inhibitor cocktail (Sigma) and 5  $\mu\text{L}$  benzonase (Novagen,  
41 Madison, WI). Cells were lysed by sonication and the suspension centrifuged ( $10,000\times g$ ,  $4^\circ\text{C}$ ,  
42 20 minutes). The clear supernatant was incubated with 600  $\mu\text{L}$  amylose resin (NEB) and the  
43 resin was loaded on a Prep column (BioRad, Carlsbad, CA). Following washing the resin with  
44  
45  
46  
47  
48  
49

1  
2  
3  
4 10 column volumes (CV) of lysis buffer containing 1 mM maltose, bound protein was eluted  
5 with lysis buffer supplemented with 10 mM maltose, yielding protein of >95% purity as  
6 determined by SDS-PAGE (see Fig. S1). The protein concentration was measured by  
7 absorbance at 280 nm (MBP-DmdNK,  $\epsilon = 106,230 \text{ M}^{-1} \text{ cm}^{-1}$ ) and sample aliquots were flash-  
8 frozen for storage at  $-80^\circ\text{C}$ .  
9

10  
11 *Steady-state kinetic assays:* The kinase activity of recombinant enzymes was determined using  
12 a spectrophotometric coupled-enzyme assay.<sup>4</sup> Briefly, 2'-deoxyribonucleosides and NAs at 1  
13  $\mu\text{M}$  to 7 mM were prepared in reaction buffer containing 50 mM Tris-HCl (pH 8), 0.15 M  
14 NaCl, 2.5 mM  $\text{MgCl}_2$ , 1 mM DTT, 1 mM ATP, 0.21 mM phosphoenolpyruvate, 0.18 mM  
15 NADH, and 30 units/mL pyruvate kinase and 33 units/mL lactate dehydrogenase. Assays were  
16 performed at  $37^\circ\text{C}$ , measuring the absorbance change at 340 nm in the presence of enzyme. The  
17 enzyme amount was adjusted to limit NADH turnover to 10% over the time of the experiment.  
18 All experiments were performed in triplicate and kinetic data was determined by non-linear  
19 regression analysis using the Michaelis-Menten equation in Origin<sup>®7</sup> (OriginLab,  
20 Northampton, MA). An representative example of the primary data for the determination of  
21 kinetic parameters for RosD7 is shown in Fig. S2. Separate kinetic experiments with RosD7  
22 lacking the MBP fusion tag did not indicate a significant change in the kinetic performance of  
23 the enzyme (data not shown).  
24  
25  
26

27  
28 *Thermostability:* Enzyme activity after 10-minute incubation at  $4^\circ\text{C}$  and  $37^\circ\text{C}$ , respectively, was  
29 determined using the standard kinetic assay with thymidine (0.7 mM) and ATP (1 mM).  
30 Thermostability (TS) was expressed as % residual activity =  $100\% * v_{\text{max}}(37^\circ\text{C})/v_{\text{max}}(4^\circ\text{C})$ . All  
31 experiments were performed in triplicate.  
32  
33

## 34 REFERENCES

- 35  
36  
37 1. N. E. Mikkelsen, K. Johansson, A. Karlsson, W. Knecht, G. Andersen, J. Piskur, B.  
38 Munch-Petersen and H. Eklund, *Biochemistry*, 2003, **42**, 5706-5712.  
39  
40 2. B. Kuhlman, D. Baker, *Proc. Natl. Acad. Sci. U.S.A.*, 2000, **97**, 10383-10388.  
41  
42 3. C.A. Rohl, C.E. Strauss, K.M. Misura, D. Baker, *Methods Enzymol.*, 2004, **383**, 66-93.  
43  
44 4. M. L. Gerth and S. Lutz, *Biochem. Biophys. Res. Commun.*, 2007, **354**, 802-807.  
45  
46  
47  
48  
49

**Table S1:** Comparison of kinetic properties of designer kinase (RosD4) with substitutions in position 172.

| enzyme                     |                                        | T               | ddT             | RS   | enzyme                     |                                        | T               | ddT             | RS  |
|----------------------------|----------------------------------------|-----------------|-----------------|------|----------------------------|----------------------------------------|-----------------|-----------------|-----|
| <b>RosD4</b>               | $k_{cat}$ ( $s^{-1}$ )                 | $4.6 \pm 0.1$   | $0.4 \pm 0.01$  |      | <b>RosD4-E172Y</b>         | $k_{cat}$ ( $s^{-1}$ )                 | $0.21 \pm 0.01$ | $0.28 \pm 0.01$ |     |
| (L66F, Y70M, V175Y)        | $K_M$ ( $\mu M$ )                      | $56 \pm 2$      | $36 \pm 2$      |      | (L66F, Y70M, V175Y, E172Y) | $K_M$ ( $\mu M$ )                      | $86 \pm 4$      | $50 \pm 6$      |     |
|                            | $k_{cat}/K_M$ ( $10^3 M^{-1} s^{-1}$ ) | 83              | 11              | 0.13 |                            | $k_{cat}/K_M$ ( $10^3 M^{-1} s^{-1}$ ) | 2.4             | 5.6             | 2.3 |
|                            |                                        | <b>(-3)</b>     | <b>(-1.3)</b>   |      |                            |                                        | <b>(-61)</b>    | <b>(-1.9)</b>   |     |
|                            |                                        | <b>(-20)</b>    | <b>(+3)</b>     |      |                            |                                        | <b>(-32)</b>    | <b>(+2.3)</b>   |     |
|                            |                                        | <b>(-58)</b>    | <b>(+2.4)</b>   |      |                            |                                        | <b>(-2005)</b>  | <b>(+1.2)</b>   |     |
| <b>RosD5</b>               | $k_{cat}$ ( $s^{-1}$ )                 | $0.08 \pm 0.01$ | $0.19 \pm 0.01$ |      | <b>RosD4-E172M</b>         | $k_{cat}$ ( $s^{-1}$ )                 | $0.18 \pm 0.01$ | $0.35 \pm 0.01$ |     |
| (L66F, Y70M, V175Y, E172V) | $K_M$ ( $\mu M$ )                      | $96 \pm 15$     | $35 \pm 4$      |      | (L66F, Y70M, V175Y, E172M) | $K_M$ ( $\mu M$ )                      | $66 \pm 9$      | $52 \pm 6$      |     |
|                            | $k_{cat}/K_M$ ( $10^3 M^{-1} s^{-1}$ ) | 0.84            | 5.4             | 6.4  |                            | $k_{cat}/K_M$ ( $10^3 M^{-1} s^{-1}$ ) | 2.7             | 6.8             | 2.5 |
|                            |                                        | <b>(-160)</b>   | <b>(-2.8)</b>   |      |                            |                                        | <b>(-71)</b>    | <b>(-1.5)</b>   |     |
|                            |                                        | <b>(-36)</b>    | <b>(+3.3)</b>   |      |                            |                                        | <b>(-24)</b>    | <b>(+2.3)</b>   |     |
|                            |                                        | <b>(-5730)</b>  | <b>(+1.1)</b>   |      |                            |                                        | <b>(-1780)</b>  | <b>(+1.5)</b>   |     |
| <b>RosD6</b>               | $k_{cat}$ ( $s^{-1}$ )                 | $0.21 \pm 0.01$ | $0.41 \pm 0.01$ |      | <b>RosD4-E172A</b>         | $k_{cat}$ ( $s^{-1}$ )                 | $0.24 \pm 0.01$ | $0.46 \pm 0.01$ |     |
| (L66F, Y70M, V175Y, E172I) | $K_M$ ( $\mu M$ )                      | $66 \pm 7$      | $35 \pm 4$      |      | (L66F, Y70M, V175Y, E172A) | $K_M$ ( $\mu M$ )                      | $65 \pm 5$      | $50 \pm 4$      |     |
|                            | $k_{cat}/K_M$ ( $10^3 M^{-1} s^{-1}$ ) | 3.2             | 12              | 3.7  |                            | $k_{cat}/K_M$ ( $10^3 M^{-1} s^{-1}$ ) | 3.7             | 9.3             | 2.5 |
|                            |                                        | <b>(-60)</b>    | <b>(-1.3)</b>   |      |                            |                                        | <b>(-53)</b>    | <b>(-1.1)</b>   |     |
|                            |                                        | <b>(-24)</b>    | <b>(+3.3)</b>   |      |                            |                                        | <b>(-24)</b>    | <b>(+2.3)</b>   |     |
|                            |                                        | <b>(-1500)</b>  | <b>(+2.6)</b>   |      |                            |                                        | <b>(-1300)</b>  | <b>(+2)</b>     |     |
| <b>RosD4-E172P</b>         | $k_{cat}$ ( $s^{-1}$ )                 | $0.16 \pm 0.01$ | $0.28 \pm 0.01$ |      | <b>RosD4-E172T</b>         | $k_{cat}$ ( $s^{-1}$ )                 | $0.19 \pm 0.01$ | $0.44 \pm 0.01$ |     |
| (L66F, Y70M, V175Y, E172P) | $K_M$ ( $\mu M$ )                      | $74 \pm 12$     | $42 \pm 2$      |      | (L66F, Y70M, V175Y, E172T) | $K_M$ ( $\mu M$ )                      | $91 \pm 5$      | $47 \pm 3$      |     |
|                            | $k_{cat}/K_M$ ( $10^3 M^{-1} s^{-1}$ ) | 2.2             | 6.7             | 3    |                            | $k_{cat}/K_M$ ( $10^3 M^{-1} s^{-1}$ ) | 2.0             | 9.4             | 4.7 |
|                            |                                        | <b>(-80)</b>    | <b>(-1.9)</b>   |      |                            |                                        | <b>(-68)</b>    | <b>(-1.2)</b>   |     |
|                            |                                        | <b>(-27)</b>    | <b>(+2.7)</b>   |      |                            |                                        | <b>(-34)</b>    | <b>(+2.4)</b>   |     |
|                            |                                        | <b>(-2190)</b>  | <b>(+1.5)</b>   |      |                            |                                        | <b>(-2400)</b>  | <b>(+2)</b>     |     |
| <b>RosD4-E172H</b>         | $k_{cat}$ ( $s^{-1}$ )                 | $0.19 \pm 0.01$ | $0.29 \pm 0.01$ |      | <b>RosD4-E172G</b>         | $k_{cat}$ ( $s^{-1}$ )                 | $0.21 \pm 0.01$ | $0.23 \pm 0.01$ |     |
| (L66F, Y70M, V175Y, E172H) | $K_M$ ( $\mu M$ )                      | $77 \pm 7$      | $47 \pm 2$      |      | (L66F, Y70M, V175Y, E172G) | $K_M$ ( $\mu M$ )                      | $92 \pm 10$     | $54 \pm 7$      |     |
|                            | $k_{cat}/K_M$ ( $10^3 M^{-1} s^{-1}$ ) | 2.5             | 6.2             | 2.5  |                            | $k_{cat}/K_M$ ( $10^3 M^{-1} s^{-1}$ ) | 2.3             | 4.3             | 1.9 |
|                            |                                        | <b>(-68)</b>    | <b>(-1.9)</b>   |      |                            |                                        | <b>(-61)</b>    | <b>(-2.3)</b>   |     |
|                            |                                        | <b>(-28)</b>    | <b>(+2.4)</b>   |      |                            |                                        | <b>(-34)</b>    | <b>(+2.1)</b>   |     |
|                            |                                        | <b>(-1925)</b>  | <b>(+1.3)</b>   |      |                            |                                        | <b>(-2100)</b>  | <b>(-1.1)</b>   |     |
| <b>RosD4-E172L</b>         | $k_{cat}$ ( $s^{-1}$ )                 | $0.22 \pm 0.01$ | $0.44 \pm 0.02$ |      | <b>RosD4-E172F</b>         | $k_{cat}$ ( $s^{-1}$ )                 | $0.20 \pm 0.01$ | $0.35 \pm 0.01$ |     |
| (L66F, Y70M, V175Y, E172L) | $K_M$ ( $\mu M$ )                      | $101 \pm 21$    | $58 \pm 8$      |      | (L66F, Y70M, V175Y, E172F) | $K_M$ ( $\mu M$ )                      | $75 \pm 8$      | $41 \pm 3$      |     |
|                            | $k_{cat}/K_M$ ( $10^3 M^{-1} s^{-1}$ ) | 2.2             | 7.6             | 3.5  |                            | $k_{cat}/K_M$ ( $10^3 M^{-1} s^{-1}$ ) | 2.7             | 8.5             | 3.1 |
|                            |                                        | <b>(-58)</b>    | <b>(-1.2)</b>   |      |                            |                                        | <b>(-65)</b>    | <b>(-1.5)</b>   |     |
|                            |                                        | <b>(-37)</b>    | <b>(+2)</b>     |      |                            |                                        | <b>(-28)</b>    | <b>(+2.8)</b>   |     |
|                            |                                        | <b>(-2190)</b>  | <b>(+1.7)</b>   |      |                            |                                        | <b>(-1780)</b>  | <b>(+1.8)</b>   |     |

Grey-shaded table entry is parental enzyme. Numbers in parentheses are fold changes in catalytic efficiency for the particular substrate [ $k_{cat}/K_M$  (variant)/ $k_{cat}/K_M$  (DmdNK)]. RS: Relative specificity [ $k_{cat}/K_M$  (ddT)/ $k_{cat}/K_M$  (T)].

**Table S2:** Comparison of kinetic properties of designer kinase (RosD6) with substitutions in position 175.

| enzyme                        |                                                                     | T           | ddT         | RS  |
|-------------------------------|---------------------------------------------------------------------|-------------|-------------|-----|
| <b>RosD6</b>                  | $k_{cat}$ (s <sup>-1</sup> )                                        | 0.21 ± 0.01 | 0.41 ± 0.01 |     |
| (L66F, Y70M,<br>V175Y, E172I) | $K_M$ (μM)                                                          | 66 ± 7      | 35 ± 4      |     |
|                               | $k_{cat}/K_M$<br>(10 <sup>3</sup> M <sup>-1</sup> s <sup>-1</sup> ) | 3.2         | 12          | 3.7 |
| <b>RosD7</b>                  | $k_{cat}$ (s <sup>-1</sup> )                                        | 0.42 ± 0.02 | 0.65 ± 0.02 |     |
| (L66F, Y70M,<br>V175W, E172I) | $K_M$ (μM)                                                          | 173 ± 32    | 32 ± 4      |     |
|                               | $k_{cat}/K_M$<br>(10 <sup>3</sup> M <sup>-1</sup> s <sup>-1</sup> ) | 2.4         | 20.5        | 8.5 |
| <b>RosD6-Y175F</b>            | $k_{cat}$ (s <sup>-1</sup> )                                        | 0.12 ± 0.01 | 0.34 ± 0.01 |     |
| (L66F, Y70M,<br>V175F, E172I) | $K_M$ (μM)                                                          | 202 ± 79    | 120 ± 16    |     |
|                               | $k_{cat}/K_M$<br>(10 <sup>3</sup> M <sup>-1</sup> s <sup>-1</sup> ) | 0.6         | 2.8         | 4.7 |
| <b>RosD6-Y175I</b>            | $k_{cat}$ (s <sup>-1</sup> )                                        | 0.10 ± 0.01 | 0.38 ± 0.04 |     |
| (L66F, Y70M,<br>V175I, E172I) | $K_M$ (μM)                                                          | 331 ± 131   | 800 ± 183   |     |
|                               | $k_{cat}/K_M$<br>(10 <sup>3</sup> M <sup>-1</sup> s <sup>-1</sup> ) | 0.30        | 0.48        | 1.6 |
| <b>RosD6-Y175L</b>            | $k_{cat}$ (s <sup>-1</sup> )                                        | 0.22 ± 0.01 | 0.53 ± 0.04 |     |
| (L66F, Y70M,<br>V175L, E172I) | $K_M$ (μM)                                                          | 367 ± 75    | 302 ± 73    |     |
|                               | $k_{cat}/K_M$<br>(10 <sup>3</sup> M <sup>-1</sup> s <sup>-1</sup> ) | 0.60        | 1.8         | 3   |
| <b>RosD6-Y175M</b>            | $k_{cat}$ (s <sup>-1</sup> )                                        | 0.13 ± 0.01 | 0.34 ± 0.03 |     |
| (L66F, Y70M,<br>V175M, E172I) | $K_M$ (μM)                                                          | 167 ± 25    | 353 ± 88    |     |
|                               | $k_{cat}/K_M$<br>(10 <sup>3</sup> M <sup>-1</sup> s <sup>-1</sup> ) | 0.78        | 1.0         | 1.3 |

Grey-shaded table entry is parental enzyme. Numbers in parentheses are fold changes in catalytic efficiency for the particular substrate [ $k_{cat}/K_M$  (variant)/ $k_{cat}/K_M$  (DmdNK)]. RS: Relative specificity [ $k_{cat}/K_M$  (ddT)/ $k_{cat}/K_M$  (T)].

**Figure S1:** SDS-PAGE analysis of overexpression experiment for RosD7.

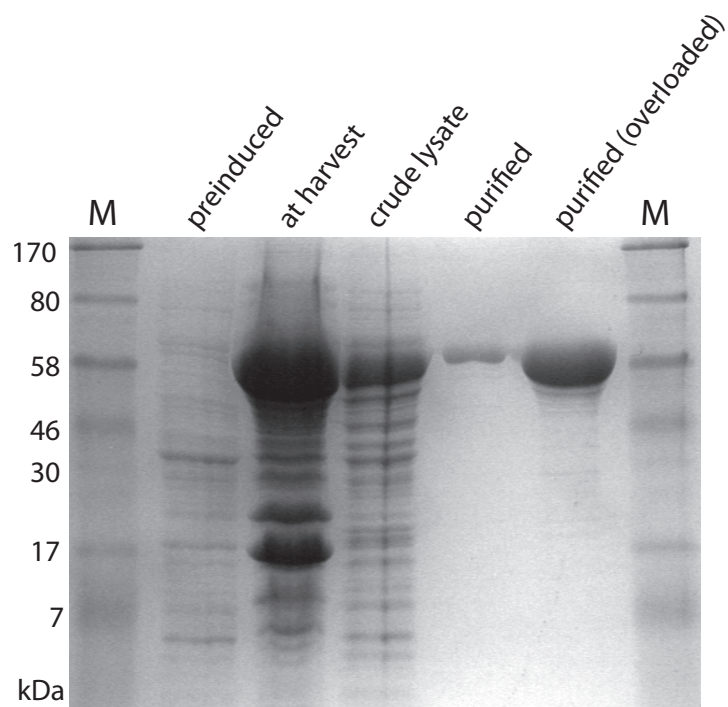

**Figure S2:** Primary kinetic data for RosD7 with 2',3'-dideoxythymidine (ddT) and thymidine. Kinetic parameters ( $K_M$  and  $v_{max}$ ) were determined by non-linear regression analysis using the Michaelis-Menten equation in Origin<sup>®</sup>7 (OriginLab, Northampton, MA).

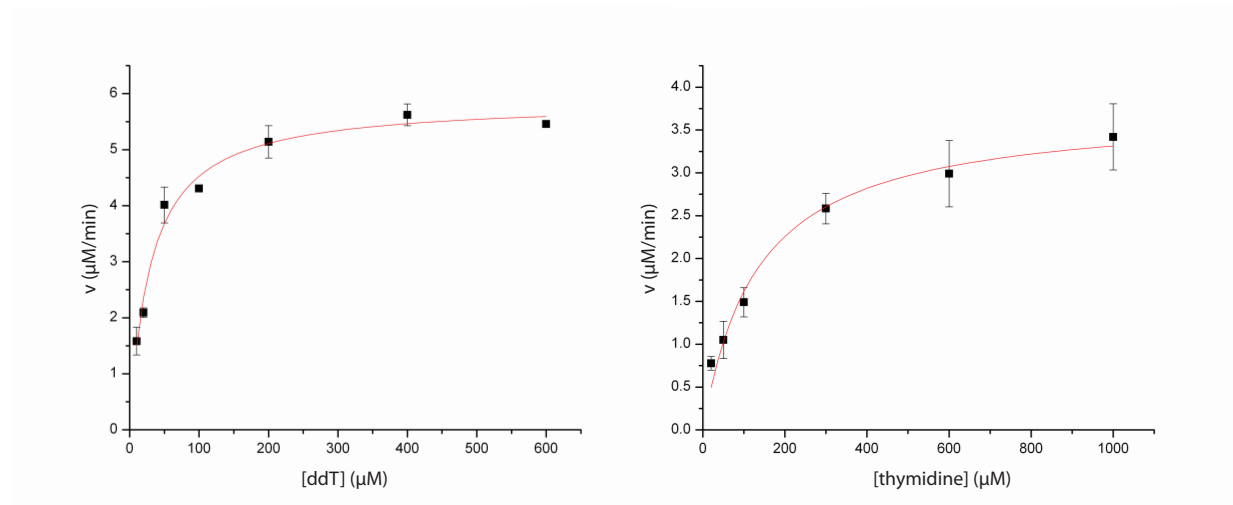

Supplement: c0cc02961k.pdf [file c0cc02961k.pdf]
